# Supplementary material for: Importance of the ligand-to-metal charge transfer (LMCT) pathway in the photocatalytic oxidation of arsenite by TiO2
Source: Royal Society of Chemistry journal article supplement (doi:10.1039/d1cp04752c), 2022-01-01
Supplement: d1cp04752c1.pdf [file d1cp04752c1.pdf]

Supporting information for

**Importance of the ligand-to-metal charge transfer (LMCT) pathway in  
the photocatalytic oxidation of arsenite by TiO<sub>2</sub>**

Si-Yuan Yu<sup>1</sup>, Ying Liu<sup>1</sup>, Hai-Tao Ren<sup>2\*</sup>, Zhao-Yu Liu<sup>1</sup> and Xu Han<sup>3\*</sup>

<sup>1</sup> School of Environmental Science and Engineering, Tiangong University, Tianjin 300387, P.R. China;

<sup>2</sup> School of Textile Science and Engineering, Tiangong University, Tianjin 300387, P.R. China;

<sup>3</sup> Key Lab of Indoor Air Environment Quality Control, School of Chemical Engineering and Technology,  
Tianjin University, Tianjin 300350, P.R. China

**Corresponding Author:**

*\*E-mail: renhaitao@tiangong.edu.cn (H.T. Ren); xuhan@tju.edu.cn (X. Han)*

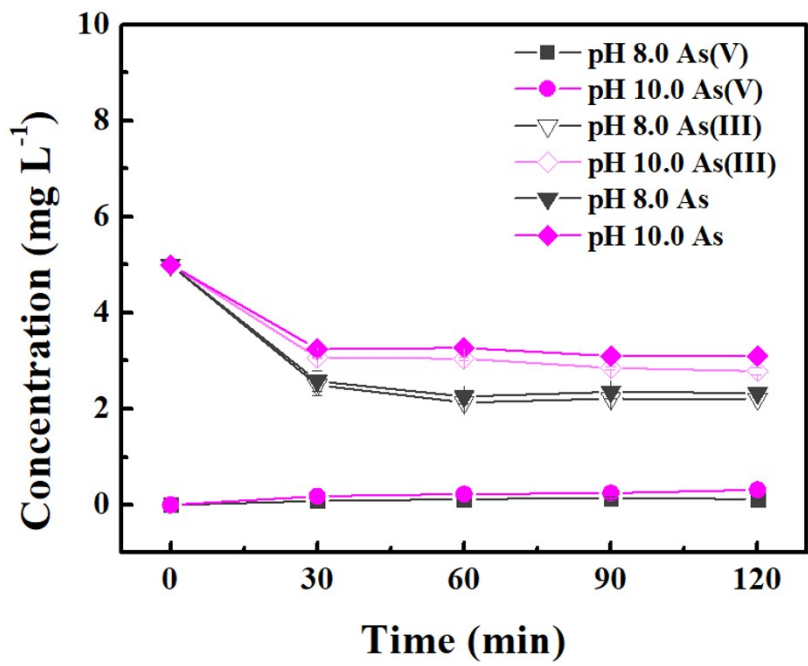

Fig. S1. Initial pH on the sorption and oxidation of As(III) by TiO<sub>2</sub> in the dark. Conditions: 1 g L<sup>-1</sup> TiO<sub>2</sub> and 5 mg L<sup>-1</sup> As(III).

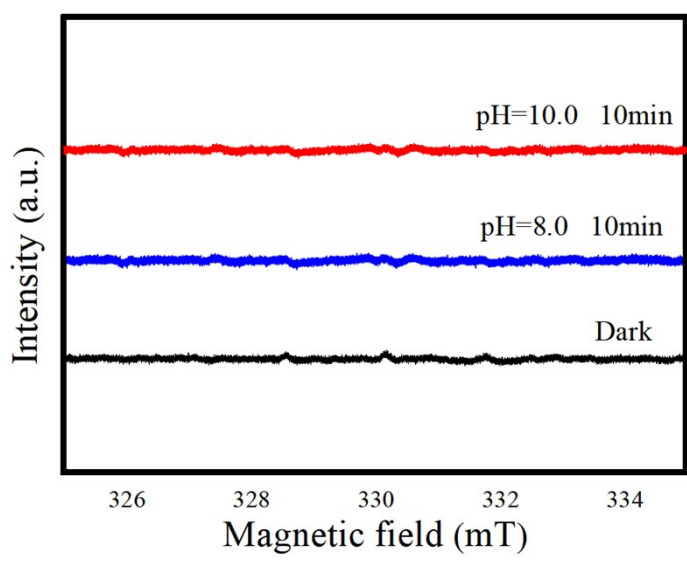

Fig. S2 ESR spectra of DMPO-O<sub>2</sub><sup>•-</sup> with TiO<sub>2</sub> under dark and UV light for 10 min at pH 8.0 and 10.0.

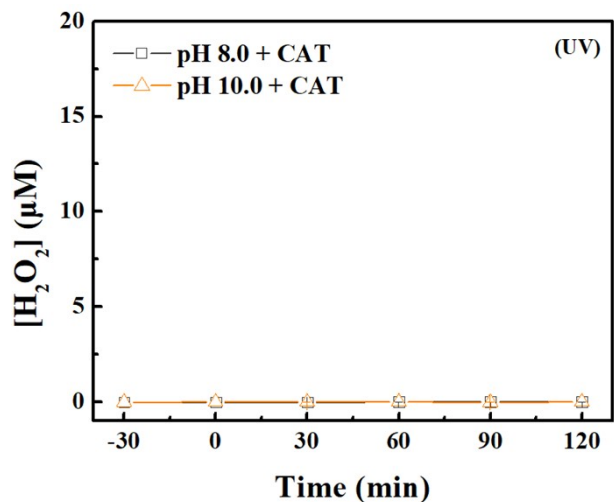

Fig. S3 H<sub>2</sub>O<sub>2</sub> was measured by adding 8000 U mL<sup>-1</sup> CAT to the TiO<sub>2</sub>/UV system. Conditions: 5 mg L<sup>-1</sup> As(III), 1 g L<sup>-1</sup> TiO<sub>2</sub>.

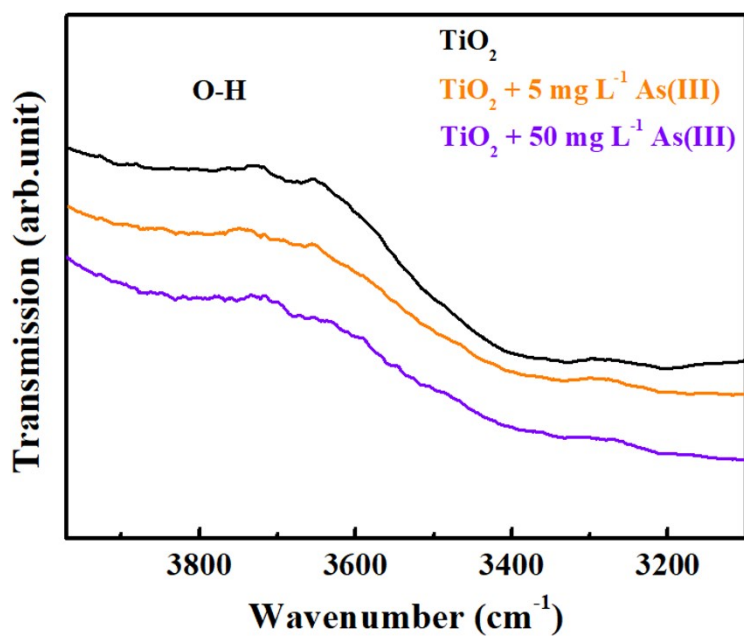

Fig. S4 ATR-FTIR spectra of TiO<sub>2</sub> with different concentrations of As(III) in the wavelength range of 3100-3970 cm<sup>-1</sup>.

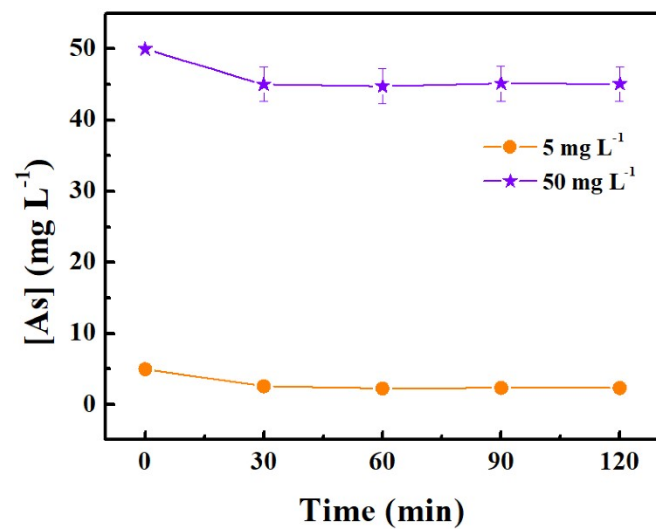

**Fig. S5.** Adsorption of As(III) by TiO<sub>2</sub> in the dark. Conditions: 1.0 g L<sup>-1</sup> TiO<sub>2</sub> at pH 8.0.
